# Supplementary material
Source: MDPI journal article supplement (https://www.mdpi.com/2072-4292/16/1/176)
Supplement: s1 [file s1]

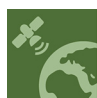

Supplementary Figures

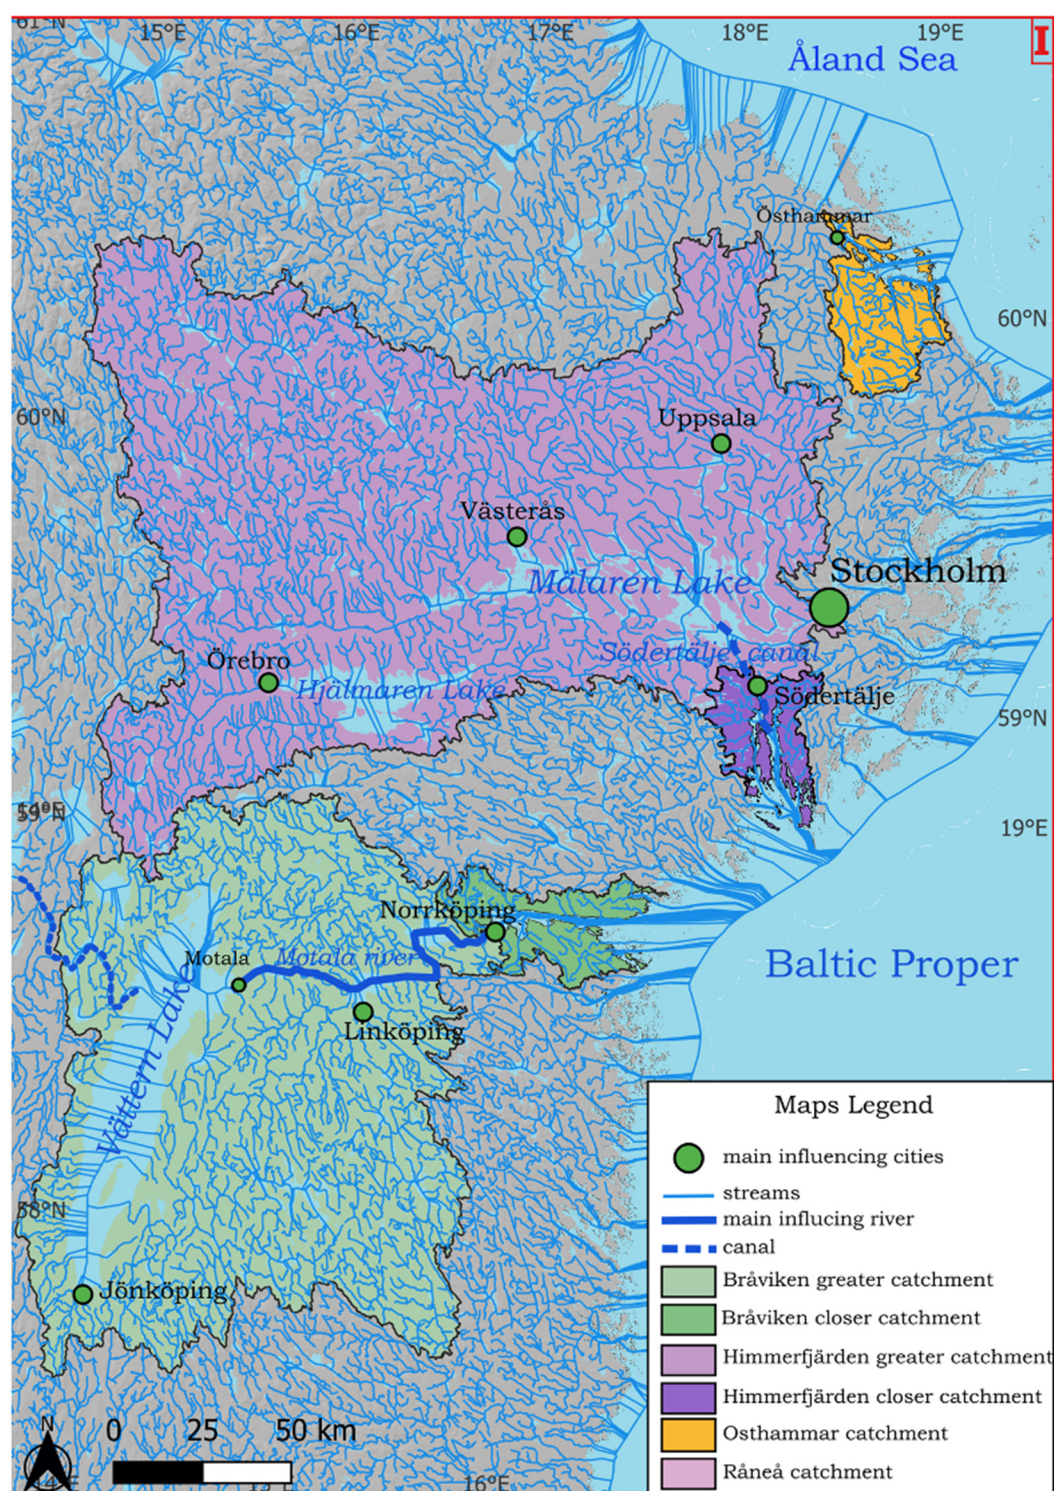

**Supplementary Figure S1a.** Water course network and catchments of Zone I: Bråviken bay (light and dark green), Himmerfjärden bay (light and dark purple), Östhammar bay (orange); please note that this figure corresponds to Figure 4a in the main paper and is redrawn here enlarged for better visual inspection of the water course network. All maps generated in QGIS using predefined shapefiles (Europe-an coastline shapefile [22]). Recurrence layer – Global Surface Water, Surface elevation – Copernicus EU-DEM- v1.1; Sentinel Hub [25]. Water course network (vattendragslinjer nätverk), SVAR (Svenskt VattenARKiv, [26]).



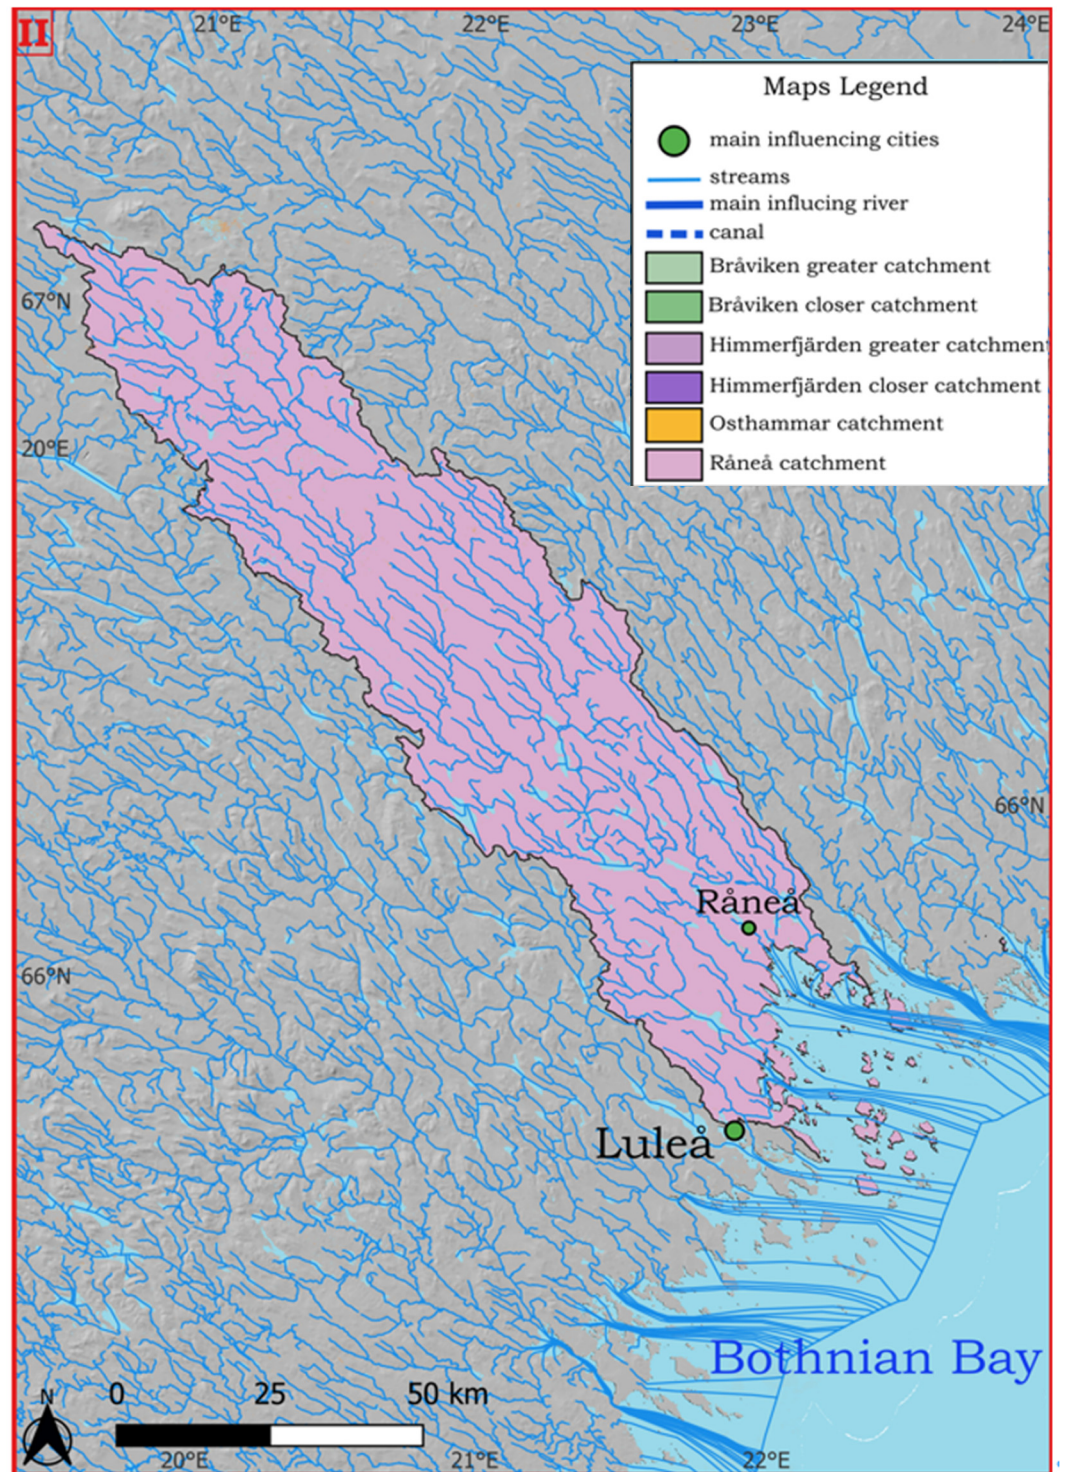

**Supplementary Figure S1b.** Water course network and catchments of Råneå bay located in Zone II (in Swedish Lapland); please note that this figure corresponds to Figure 4b in the main paper and is redrawn here enlarged for better visual inspection of the water course network.



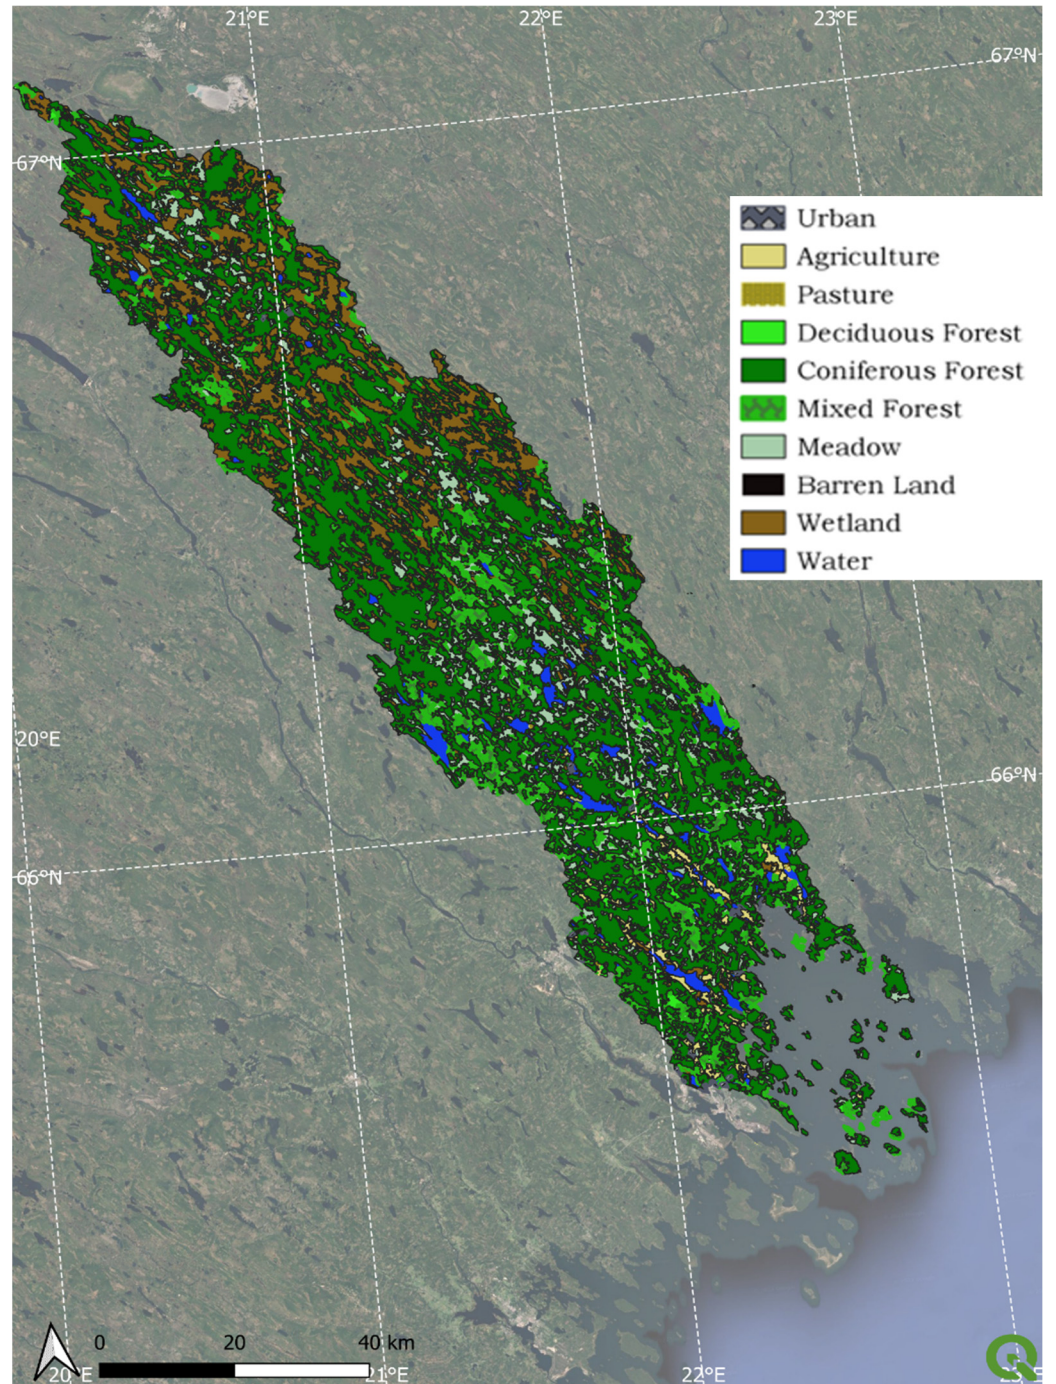

**Supplementary Figure S2a.** Landcover map for the greater catchment area of Râneå bay; please note that this figure corresponds to Figure 7a in the main paper and is redrawn here enlarged for better visual inspection of the land use and land cover.



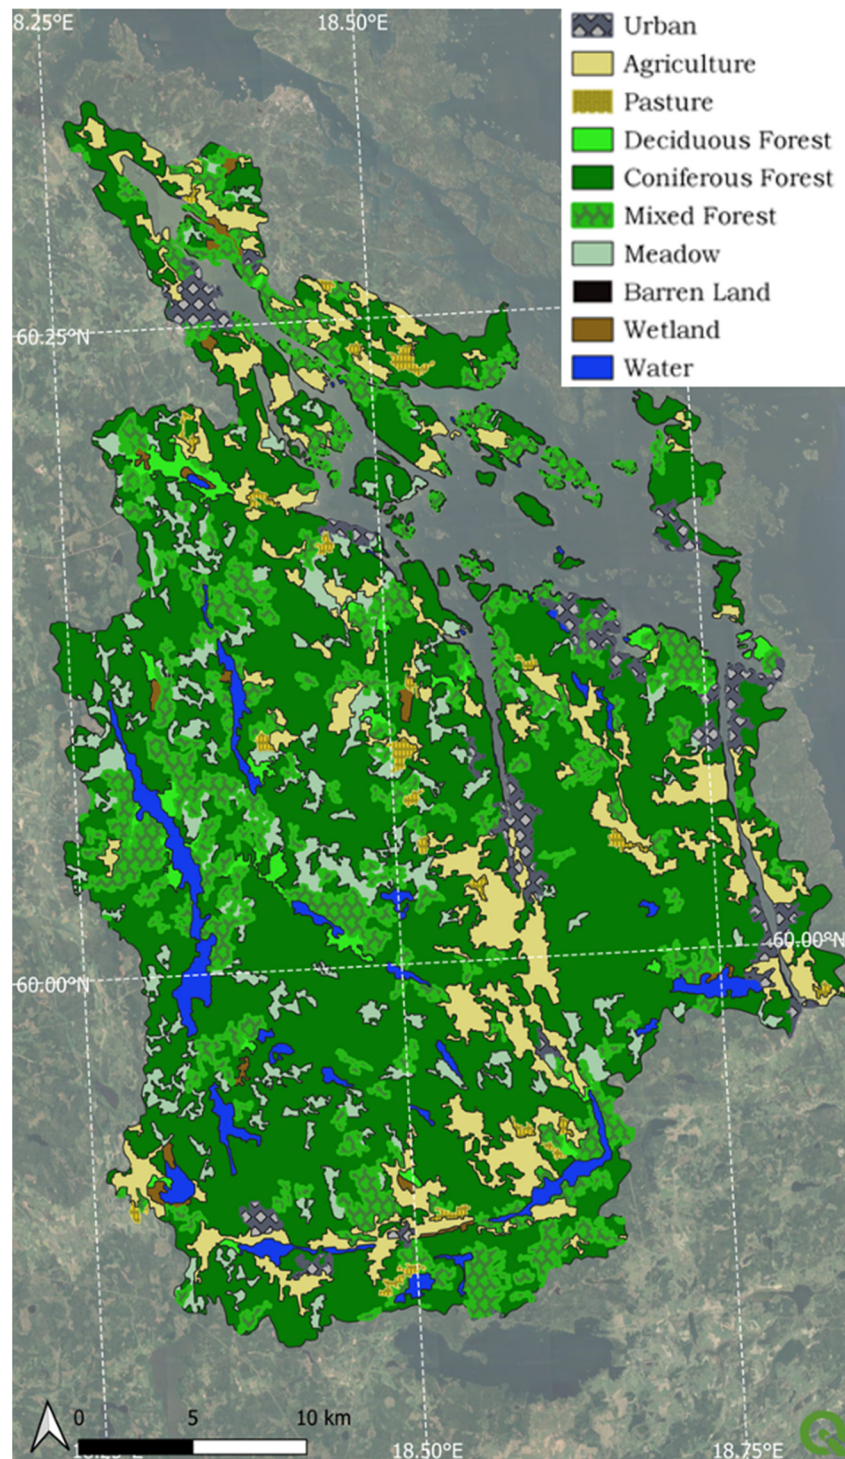

**Supplementary Figure S2b.** Landcover map for the greater catchment area of Östhammar bay; please note that this figure corresponds to Figure 7b in the main paper and is redrawn here enlarged for better visual inspection of the land use and land cover.



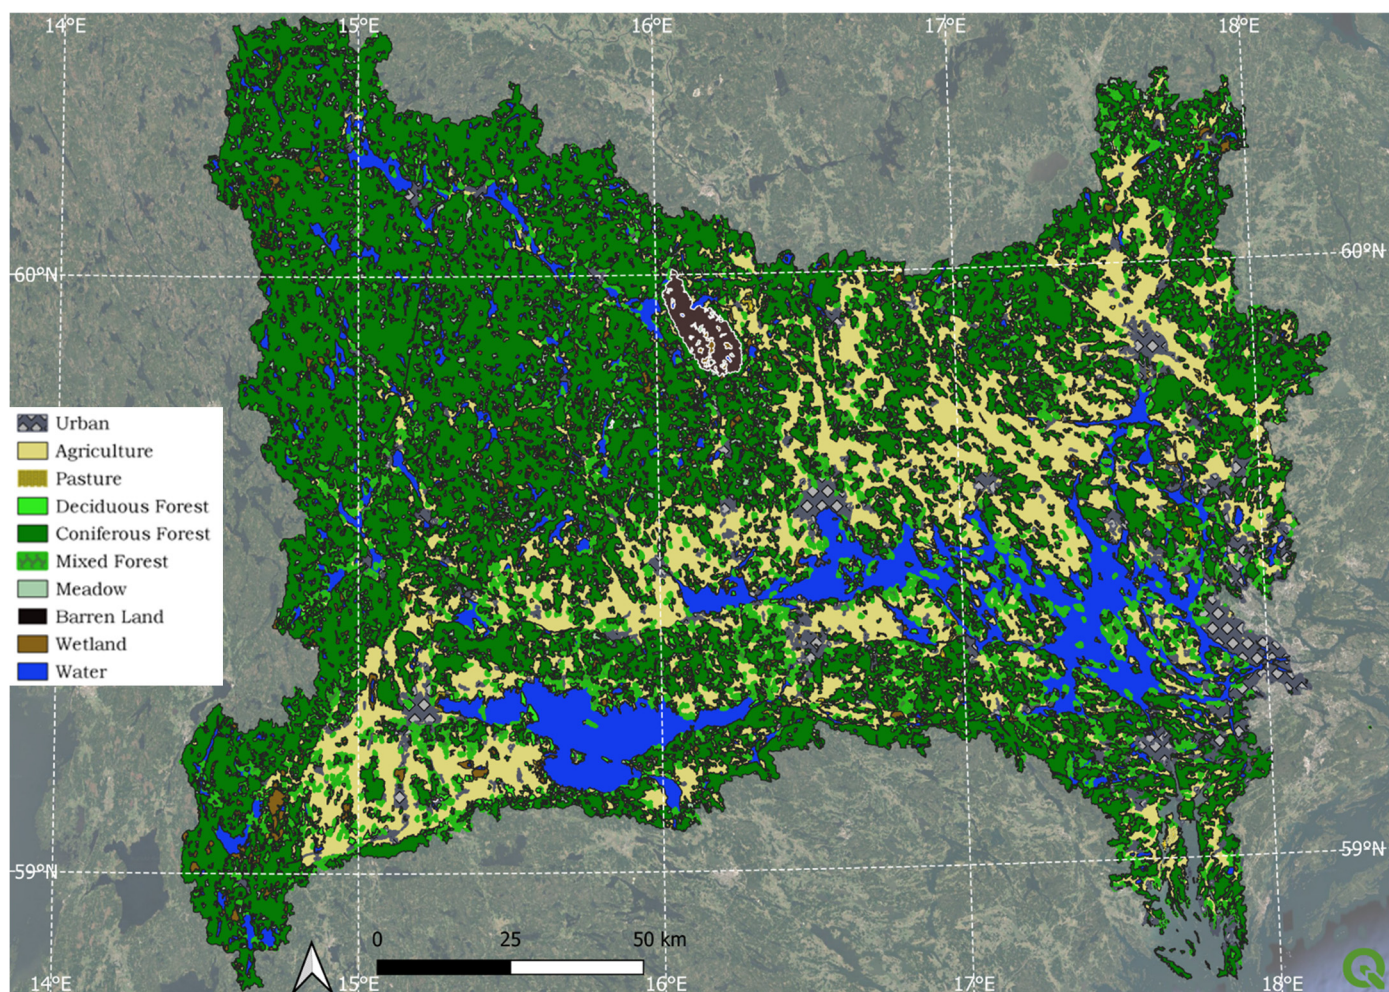

**Supplementary Figure S2c.** Landcover map for the greater catchment area of Himmerfjärden bay; please note that this figure corresponds to Figure 7c in the main paper and is redrawn here enlarged for better visual inspection of the land use and land cover.



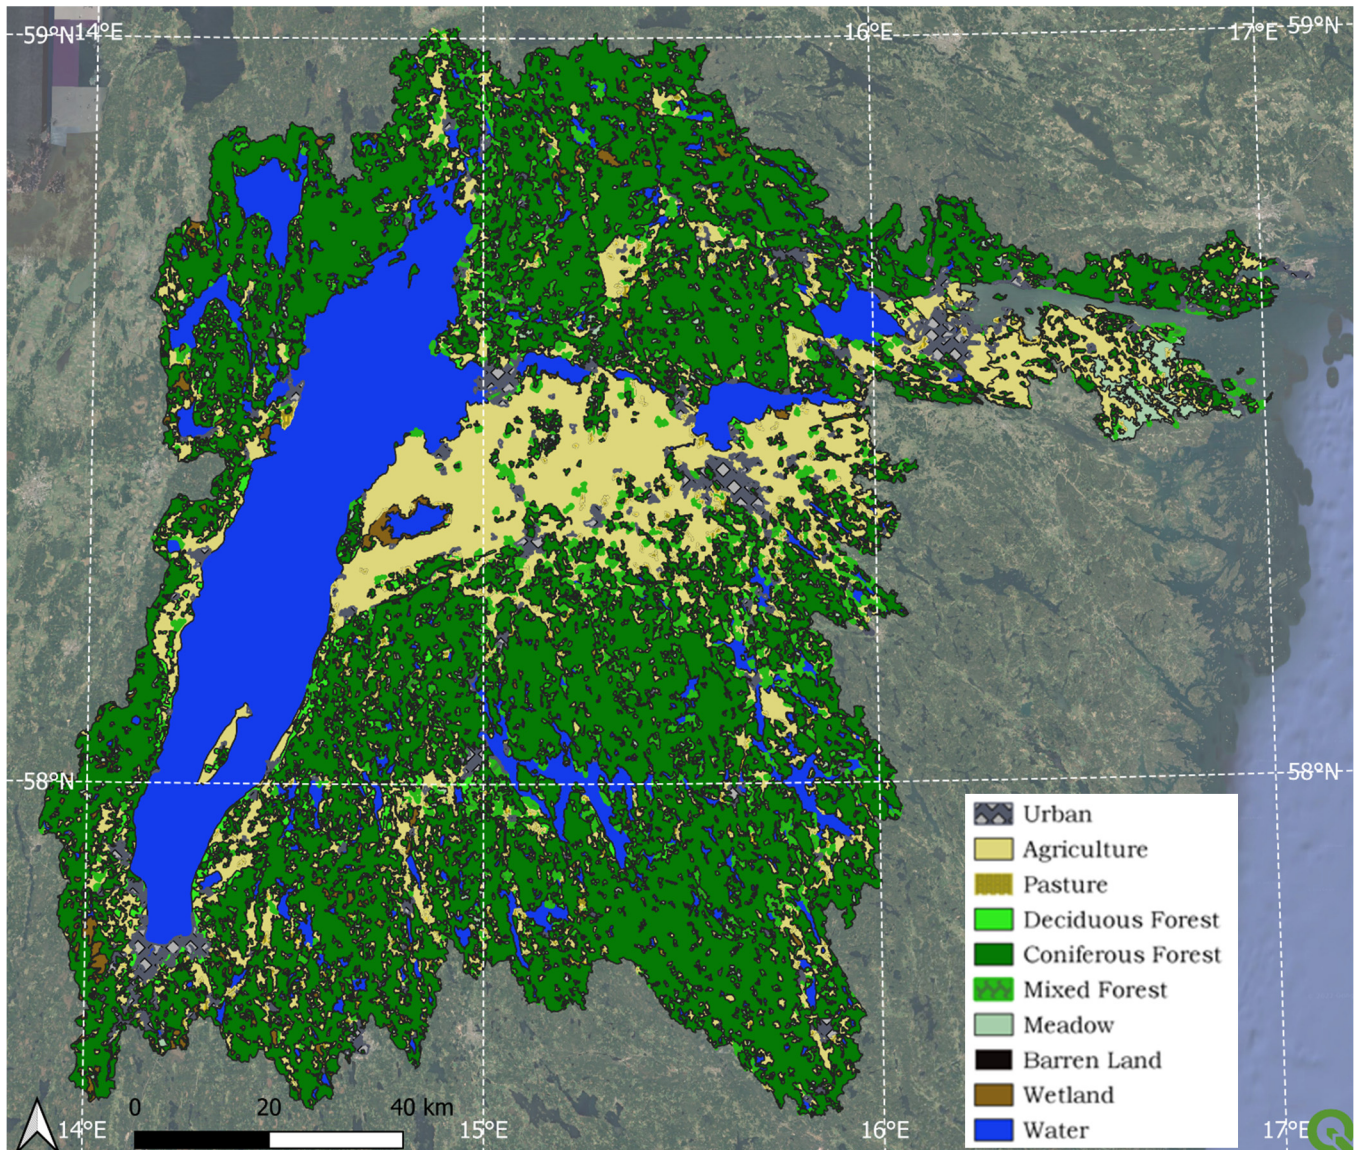

**Supplementary Figure S2d.** Landcover map for the greater catchment of Brä Viken bay; please note that this figure corresponds to Figure 7d in the main paper and is redrawn here enlarged for better visual inspection of the land use and land cover.



**Supplementary Table S1.** Corine nomenclature - Code18; Nomenclature adapted from Copernicus Land Monitoring service, available online [22].

## Corine land cover classes

### 1. Artificial surfaces

#### 1.1 Urban fabric

-  1.1.1. Continuous urban fabric
-  1.1.2. Discontinuous urban fabric

#### 1.2 Industrial, commercial and transport units

-  1.2.1. Industrial or commercial units
-  1.2.2. Road and rail networks and associated land
-  1.2.3. Port areas
-  1.2.4. Airports

#### 1.3 Mine, dump and construction sites

-  1.3.1. Mineral extraction sites
-  1.3.2. Dump sites
-  1.3.3. Construction sites

#### 1.4 Artificial, non-agricultural vegetated areas

-  1.4.1. Green urban areas
-  1.4.2. Sport and leisure facilities

### 2. Agricultural areas

#### 2.1 Arable land

-  2.1.1. Non-irrigated arable land
-  2.1.2. Permanently irrigated land
-  2.1.3. Rice fields

#### 2.2 Permanent crops

-  2.2.1. Vineyards
-  2.2.2. Fruit trees and berry plantations
-  2.2.3. Olive groves

#### 2.3 Pastures

-  2.3.1. Pastures

#### 2.4 Heterogeneous agricultural areas

-  2.4.1. Annual crops associated with permanent crops
-  2.4.2. Complex cultivation patterns
-  2.4.3. Land principally occupied by agriculture
-  2.4.4. Agro-forestry areas

### 3. Forest and seminatural areas

#### 3.1 Forests

-  3.1.1. Broad-leaved forest
-  3.1.2. Coniferous forest
-  3.1.3. Mixed forest

#### 3.2 Shrub and/or herbaceous vegetation associations

-  3.2.1. Natural grassland
-  3.2.2. Moors and heathland
-  3.2.3. Sclerophyllous vegetation
-  3.2.4. Transitional woodland shrub

#### 3.3 Open spaces with little or no vegetation

-  3.3.1. Beaches, dunes, and sand plains
-  3.3.2. Bare rock
-  3.3.3. Sparsely vegetated areas
-  3.3.4. Burnt areas
-  3.3.5. Glaciers and perpetual snow

### 4. Wetlands

#### 4.1 Inland wetlands

-  4.1.1. Inland marshes
-  4.1.2. Peat bogs

#### 4.2 Coastal wetlands

-  4.2.1. Salt marshes
-  4.2.2. Salines
-  4.2.3. Intertidal flats

### 5. Water bodies

#### 5.1 Inland waters

-  5.1.1. Water courses
-  5.1.2. Water bodies

#### 5.2 Marine waters

-  5.2.1. Coastal lagoons
-  5.2.2. Estuaries
-  5.2.3. Sea and ocean



**Supplementary Table S2.** Bio-optical dataset used in this study.

| Area     | Distance |          |            |             |                          | total    |       |      |      |      | CDOM      |                       |                          |
|----------|----------|----------|------------|-------------|--------------------------|----------|-------|------|------|------|-----------|-----------------------|--------------------------|
|          | (group)  | Location | (km)       | Date        | UTC+2hrs                 | Position | Chl-a | SPM  | SPIM | SPOM | Turbidity | linear fitting (700*) |                          |
|          |          |          | from       | Time        |                          | Lat      | Long  | µg/l | g/m3 | g/m3 | g/m3      | FNU                   | <i>a</i> <sub>CDOM</sub> |
|          |          |          | outlet     | SE_(summer) | <i>S</i> <sub>CDOM</sub> |          |       |      |      |      |           |                       |                          |
| Bråviken | BR7b     | 21.73    | 28/04/2022 | 15:20       | 58.62014                 | 16.68841 | 4.38  | 2.12 | 1.60 | 0.52 | 1.71      | 0.55                  | -0.019                   |
| (MRSG)   | BR3      | 10.62    | 28/04/2022 | 17:20       | 58.64501                 | 16.49279 | 9.32  | 3.98 | 1.43 | 2.55 | 3.21      | 1.02                  | -0.018                   |
|          | BR4      | 3.99     | 29/04/2022 | 09:15       | 58.64374                 | 16.37258 | 8.03  | 4.00 | 1.74 | 2.25 | 3.11      | 1.10                  | -0.018                   |
|          | BR7      | 21.34    | 29/04/2022 | 10:55       | 58.61834                 | 16.68158 | 6.06  | 3.48 | 1.46 | 2.02 | 2.85      | 0.98                  | -0.018                   |
|          | BR2      | 30.04    | 29/04/2022 | 12:15       | 58.59690                 | 16.82914 | 2.90  | 3.82 | 1.54 | 2.28 | 2.08      | 0.69                  | -0.019                   |
| (MRSG)   | BR5      | 0.00     | 25/04/2018 | 08:58       | 58.62553                 | 16.31293 | 8.77  | 4.11 | 3.15 | 0.96 | 4.38      | 1.36                  | -0.018                   |
|          | BR2      | 30.05    | 25/04/2018 | 13:55       | 58.59676                 | 16.82916 | 12.74 | 2.74 | 1.85 | 0.89 | 2.23      | 0.92                  | -0.017                   |
|          | BR3      | 10.46    | 25/04/2018 | 15:57       | 58.63990                 | 16.49166 | 12.65 | 4.24 | 3.26 | 0.98 | 4.38      | 1.26                  | -0.018                   |
|          | BR4      | 4.00     | 25/04/2018 | 17:20       | 58.64368                 | 16.37263 | 9.66  | 4.91 | 3.78 | 1.13 | 5.07      | 1.62                  | -0.018                   |
| (MRSG)   | BR1      | 41.69    | 24/04/2018 | 11:52       | 58.56440                 | 17.02323 | 25.05 | 3.64 | 1.98 | 1.67 | 2.53      | 1.02                  | -0.017                   |
|          | BR6      | 4.59     | 24/04/2018 | 10:11       | 58.63999                 | 16.38735 | 9.24  | 4.47 | 3.42 | 1.05 | 4.56      | 1.50                  | -0.018                   |
|          | BR7      | 21.35    | 24/04/2018 | 11:53       | 58.61839                 | 16.68164 | 12.43 | 3.72 | 2.86 | 0.86 | 3.87      | 1.01                  | -0.018                   |
|          | BR8      | 36.23    | 24/04/2018 | 13:30       | 58.58236                 | 16.93324 | 12.65 | 2.26 | 1.41 | 0.85 | 1.81      | 0.72                  | -0.018                   |
| (MG)     | GB20     | 3.99     | 17/06/2013 | N/A         | 58.61330                 | 16.77492 | 6.70  | 2.41 | 2.14 | 0.27 | N/A       | 0.75                  | N/A                      |
|          | GB16w2   | 26.77    | 17/06/2013 | N/A         | 58.63953                 | 16.38868 | 6.40  | 4.30 | 3.80 | 0.50 | N/A       | 0.83                  | N/A                      |
| (MG)     | GB16w2   | 3.99     | 18/06/2012 | N/A         | 58.61330                 | 16.77492 | 3.10  | 3.14 | 2.31 | 0.83 | 3.74      | 0.55                  | N/A                      |
|          | GB20     | 26.77    | 18/06/2012 | N/A         | 58.63953                 | 16.38868 | 9.70  | 4.36 | 3.18 | 1.18 | 5.48      | 1.09                  | N/A                      |
| (MRSG)   | BR5      | 0.00     | 02/07/2021 | 09:55       | 58.62560                 | 16.31295 | 6.62  | N/A  | N/A  | N/A  | 5.51      | 1.27                  | -0.018                   |
|          | BR2;     |          |            |             |                          |          |       |      |      |      |           |                       |                          |
|          | GB16     | 30.04    | 01/07/2021 | 13:52       | 58.59678                 | 16.82910 | 7.02  | N/A  | N/A  | N/A  | 1.83      | 0.82                  | -0.018                   |
|          | BR3;     |          |            |             |                          |          |       |      |      |      |           |                       |                          |
|          | BG22     | 10.45    | 01/07/2021 | 14:30       | 58.63992                 | 16.49152 | 4.74  | N/A  | N/A  | N/A  | 4.00      | 0.79                  | -0.018                   |



|                         |        |       |            |       |          |          |       |      |      |      |      |      |        |
|-------------------------|--------|-------|------------|-------|----------|----------|-------|------|------|------|------|------|--------|
| (MG)                    | BR4;   |       |            |       |          |          |       |      |      |      |      |      |        |
|                         | BG20   | 3.99  | 01/07/2021 | 17:40 | 58.64372 | 16.37249 | 5.20  | N/A  | N/A  | N/A  | 2.61 | 0.76 | -0.018 |
|                         | BR7b   | 21.73 | 02/07/2021 | 12:12 | 58.62039 | 16.68846 | 3.46  | N/A  | N/A  | N/A  | 1.78 | 0.77 | -0.017 |
|                         | BR9    | 36.46 | 02/07/2021 | 16:10 | 58.59784 | 16.94074 | 3.65  | N/A  | N/A  | N/A  | 1.24 | 0.42 | -0.018 |
|                         | GB20   | 3.99  | 09/07/2013 | N/A   | 58.61330 | 16.77492 | 18.00 | 6.77 | 4.90 | 1.87 | N/A  | 1.26 | N/A    |
|                         | GB16w2 | 26.77 | 09/07/2013 | N/A   | 58.63953 | 16.38868 | 4.00  | 5.51 | 4.77 | 0.74 | N/A  | 0.82 | N/A    |
|                         | GB20   | 3.99  | 12/08/2013 | N/A   | 58.61330 | 16.77492 | 9.70  | 6.05 | 4.44 | 1.61 | N/A  | 0.89 | N/A    |
|                         | GB16w2 | 26.77 | 12/08/2013 | N/A   | 58.63953 | 16.38868 | 6.90  | 4.45 | 3.52 | 0.94 | N/A  | 0.73 | N/A    |
|                         | GB16w2 | 3.99  | 20/08/2012 | N/A   | 58.61330 | 16.77492 | 4.90  | 3.66 | 2.85 | 0.81 | 4.80 | 0.92 | N/A    |
| Himmerfjärden<br>(MRSG) | GB20   | 26.77 | 20/08/2012 | N/A   | 58.63953 | 16.38868 | 5.40  | 5.20 | 4.33 | 0.86 | 7.48 | 0.96 | N/A    |
|                         | H5     | 0.00  | 17/04/2018 | 12:52 | 59.03783 | 17.72600 | N/A   | N/A  | N/A  | N/A  | 1.39 | 0.62 | -0.019 |
|                         | H3     | 11.50 | 17/04/2018 | 10:55 | 58.93433 | 17.72600 | N/A   | N/A  | N/A  | N/A  | 1.32 | 0.58 | -0.019 |
| (MRSG)                  | H4     | 6.00  | 17/04/2018 | 10:05 | 58.98383 | 17.72433 | 7.08  | N/A  | N/A  | N/A  | 1.55 | 0.60 | -0.019 |
|                         | B1     | 26.71 | 17/04/2018 | 08:20 | 58.80333 | 17.62367 | 3.37  | N/A  | N/A  | N/A  | 0.77 | 0.34 | -0.021 |
|                         | H4     | 6.22  | 27/04/2012 | 13:20 | 58.98393 | 17.72516 | 13.70 | 2.53 | 1.01 | 1.51 | 1.96 | 0.54 | -0.017 |
| (MRSG)                  | H3     | 11.51 | 27/04/2012 | 14:15 | 58.84250 | 17.79033 | 5.05  | 1.51 | 0.61 | 0.91 | 1.11 | 0.50 | -0.017 |
|                         | H2     | 21.80 | 27/04/2012 | 15:00 | 58.93433 | 17.72600 | 3.39  | 1.15 | 0.52 | 0.64 | 1.09 | 0.34 | -0.018 |
|                         | H5     | 0.00  | 10/05/2012 | 13:50 | 59.03727 | 17.72016 | 3.66  | 1.22 | 0.43 | 0.79 | 1.26 | 0.60 | -0.016 |
|                         | H2     | 22.10 | 10/05/2012 | 11:35 | 58.84156 | 17.78891 | 1.81  | 0.75 | 0.27 | 0.48 | 0.75 | 0.33 | -0.019 |
|                         | H4     | 5.93  | 10/05/2012 | 12:55 | 58.98394 | 17.72540 | 4.69  | 1.48 | 0.62 | 0.86 | 1.13 | 0.53 | -0.017 |
| (MRSG)                  | B1     | 26.56 | 10/05/2012 | 10:17 | 58.80341 | 17.62467 | 1.60  | 0.96 | 0.40 | 0.57 | 0.80 | 0.43 | -0.016 |
|                         | H5     | 0.00  | 20/06/2001 | 08:00 | 59.03650 | 17.72333 | 3.61  | 1.93 | 1.24 | 0.69 | N/A  | 0.58 | -0.019 |
|                         | H4     | 5.78  | 20/06/2001 | 09:05 | 58.98450 | 17.72667 | 4.17  | 2.20 | 1.36 | 0.84 | N/A  | 0.52 | -0.019 |
| (MRSG)                  | H3     | 11.40 | 20/06/2001 | 11:00 | 58.93400 | 17.73017 | 1.81  | 1.70 | 1.20 | 0.51 | N/A  | 0.50 | -0.019 |
|                         | H2     | 22.17 | 20/06/2001 | 11:35 | 58.84000 | 17.79033 | 1.34  | 0.88 | 0.43 | 0.45 | N/A  | 0.39 | -0.019 |
|                         | B1     | 26.35 | 20/06/2001 | 12:40 | 58.80467 | 17.62667 | 1.32  | 0.48 | 0.21 | 0.28 | N/A  | 0.39 | -0.019 |
|                         | H5     | 0.00  | 21/07/2017 | 10:30 | 59.03657 | 17.72120 | 2.98  | 1.64 | 0.72 | 0.92 | 1.55 | 0.59 | -0.017 |
|                         | H4     | 5.86  | 21/07/2017 | 12:15 | 58.98390 | 17.72423 | 6.11  | 1.80 | 0.62 | 1.19 | 1.58 | 0.45 | -0.019 |
|                         | H3     | 11.39 | 21/07/2017 | 13:10 | 58.93407 | 17.72675 | 5.10  | 1.60 | 0.56 | 1.04 | 1.33 | 0.47 | -0.017 |

|                      |                   |   |     |       |            |       |  |          |          |       |      |      |      |      |      |        |
|----------------------|-------------------|---|-----|-------|------------|-------|--|----------|----------|-------|------|------|------|------|------|--------|
| (MRSO)               | Averaged<br>trans | 3 | B1  | 26.57 | 21/07/2017 | 13:15 |  | 58.80280 | 17.62400 | 2.63  | 0.77 | 0.18 | 0.59 | 0.58 | 0.39 | -0.018 |
|                      |                   |   | H4  | 5.68  | 15,18,28   |       |  | 58.98386 | 17.72388 | 7.16  | 2.69 | 1.10 | 1.59 | N/A  | 0.75 | -0.014 |
|                      |                   |   | H3  | 11.21 |            |       |  | 58.93408 | 17.72676 | 5.68  | 2.39 | 1.04 | 1.35 | N/A  | 0.43 | -0.018 |
|                      |                   |   | H2  | 22.95 |            |       |  | 58.82847 | 17.73230 | 4.44  | 1.51 | 0.47 | 1.05 | N/A  | 0.49 | -0.017 |
| (MRSO)               |                   |   | H3  | 5.62  | 02/07/2001 | 09:25 |  | 58.93400 | 17.73017 | 4.96  | 2.48 | 1.33 | 1.15 | N/A  | 0.46 | -0.018 |
|                      |                   |   | H2  | 16.47 | 02/07/2001 | 10:45 |  | 58.84000 | 17.79033 | 3.49  | 1.21 | 0.31 | 0.90 | N/A  | 0.50 | -0.018 |
|                      |                   |   | B1  | 20.79 | 02/07/2001 | 11:05 |  | 58.80467 | 17.62667 | 3.40  | 1.71 | 0.63 | 1.08 | N/A  | 0.41 | -0.018 |
|                      |                   |   | H5  | 0.00  | 21/08/2017 | 13:36 |  | 59.03780 | 17.72598 | 6.66  | N/A  | N/A  | N/A  | 1.86 | N/A  | N/A    |
| (MG)                 |                   |   | H2  | 11.50 | 21/08/2017 | 09:10 |  | 58.84250 | 17.79033 | 3.85  | N/A  | N/A  | N/A  | 0.77 | 0.31 | -0.021 |
|                      |                   |   | H3  | 6.00  | 21/08/2017 | 11:08 |  | 58.93433 | 17.72600 | 4.59  | N/A  | N/A  | N/A  | 1.37 | 0.38 | -0.019 |
|                      |                   |   | H4  | 26.70 | 21/08/2017 | 10:15 |  | 58.98378 | 17.72435 | 4.72  | 1.72 | 0.89 | 0.84 | 1.01 | 0.39 | -0.020 |
|                      |                   |   | B1  | 22.01 | 21/08/2017 | 07:45 |  | 58.80317 | 17.62533 | 1.82  | 1.25 | 0.25 | 1.00 | 1.50 | 0.30 | -0.021 |
| (MRSO)               |                   |   | H4  | 5.93  | 20/08/2010 | 08:20 |  | 58.98394 | 17.72428 | 5.70  | 1.76 | 1.08 | 0.67 | N/A  | 0.80 | -0.014 |
|                      |                   |   | H2  | 22.06 | 20/08/2010 | 10:10 |  | 58.84134 | 17.78222 | 4.25  | 1.65 | 0.57 | 1.09 | N/A  | 0.44 | -0.017 |
|                      |                   |   | B1  | 26.63 | 20/08/2010 | 11:30 |  | 58.80265 | 17.62538 | 6.32  | 1.72 | 0.43 | 1.29 | N/A  | 0.40 | -0.017 |
|                      |                   |   | H5  | 0.00  | 12,22      |       |  | 59.03693 | 17.72186 | 4.06  | 1.92 | 0.90 | 1.01 | N/A  | 0.66 | -0.018 |
| Average<br>transects |                   | 2 | H4  | 5.91  |            |       |  | 58.98374 | 17.72397 | 4.74  | 1.77 | 0.70 | 1.06 | N/A  | 0.60 | -0.017 |
|                      |                   |   | H3  | 11.47 |            |       |  | 58.93374 | 17.72915 | 4.16  | 1.67 | 0.55 | 1.12 | N/A  | 0.46 | -0.017 |
|                      |                   |   | H2  | 22.16 |            |       |  | 58.84055 | 17.78911 | 3.80  | 1.14 | 0.22 | 0.92 | N/A  | 0.42 | -0.017 |
|                      |                   |   | U11 | 22.96 | 17/07/2021 | 08:23 |  | 60.16031 | 18.58518 | 2.65  | N/A  | N/A  | N/A  | 1.01 | 0.81 | -0.017 |
| (MG)                 |                   |   | U13 | 18.17 | 17/07/2021 | 07:08 |  | 60.17682 | 18.48382 | 4.09  | N/A  | N/A  | N/A  | 2.50 | 1.00 | -0.017 |
|                      |                   |   | U18 | 9.41  | 17/07/2021 | 06:09 |  | 60.24931 | 18.41649 | 23.47 | N/A  | N/A  | N/A  | 7.00 | 2.32 | -0.016 |
|                      |                   |   | U14 | 14.43 | 17/07/2021 | 06:24 |  | 60.21550 | 18.47713 | 8.85  | N/A  | N/A  | N/A  | 3.43 | 1.23 | -0.017 |
|                      |                   |   | U11 | 22.96 | 11/07/2020 | 08:00 |  | 60.16031 | 18.58518 | 4.19  | N/A  | N/A  | N/A  | 1.63 | 0.87 | -0.018 |
| (MG)                 |                   |   | U13 | 18.17 | 11/07/2020 | 06:46 |  | 60.17682 | 18.48382 | 2.74  | N/A  | N/A  | N/A  | 2.61 | 1.08 | -0.018 |
|                      |                   |   | U18 | 9.41  | 11/07/2020 | 05:59 |  | 60.24931 | 18.41649 | 22.90 | N/A  | N/A  | N/A  | 6.12 | 1.16 | -0.018 |
|                      |                   |   | U14 | 14.43 | 11/07/2020 | 05:32 |  | 60.21550 | 18.47713 | 3.41  | N/A  | N/A  | N/A  | 3.16 | 1.16 | -0.017 |



|            |     |       |            |       |          |          |       |       |      |       |      |      |        |
|------------|-----|-------|------------|-------|----------|----------|-------|-------|------|-------|------|------|--------|
| (MG)       | U11 | 22.96 | 13/07/2019 | 10:00 | 60.16031 | 18.58518 | 4.16  | N/A   | N/A  | N/A   | 2.67 | N/A  | N/A    |
|            | U13 | 18.17 | 13/07/2019 | 08:45 | 60.17682 | 18.48382 | 3.92  | N/A   | N/A  | N/A   | 3.11 | N/A  | N/A    |
|            | U18 | 9.41  | 13/07/2019 | 07:58 | 60.24931 | 18.41649 | 30.79 | N/A   | N/A  | N/A   | 6.60 | N/A  | N/A    |
|            | U14 | 14.43 | 13/07/2019 | 07:29 | 60.21550 | 18.47713 | 7.49  | N/A   | N/A  | N/A   | 4.11 | N/A  | N/A    |
| (MG)       | U22 | 2.46  | 29/07/2010 | N/A   | 60.29772 | 18.33597 | 89.88 | N/A   | N/A  | N/A   | N/A  | N/A  | N/A    |
|            | U18 | 9.41  | 21/07/2010 | N/A   | 60.24931 | 18.41649 | 17.37 | N/A   | N/A  | N/A   | N/A  | 1.52 | -0.015 |
|            | U14 | 14.43 | 21/07/2010 | N/A   | 60.21550 | 18.47713 | 9.28  | 4.77  | 0.72 | 4.06  | N/A  | 2.46 | -0.010 |
|            | U13 | 18.17 | 21/07/2010 | N/A   | 60.17682 | 18.48382 | 3.30  | 7.42  | 3.89 | 3.53  | N/A  | 0.91 | -0.016 |
| (MG)       | U11 | 22.96 | 21/07/2010 | N/A   | 60.16031 | 18.58518 | 2.72  | N/A   | N/A  | N/A   | N/A  | 0.95 | -0.017 |
|            | U15 | 28.26 | 21/07/2010 | N/A   | 60.15101 | 18.70181 | 2.30  | 1.75  | 0.26 | 1.49  | N/A  | 1.17 | -0.015 |
|            | U11 | 22.96 | 14/08/2021 | 07:49 | 60.16031 | 18.58518 | 5.52  | N/A   | N/A  | N/A   | 0.93 | 0.60 | -0.018 |
|            | U13 | 18.17 | 14/08/2021 | 06:37 | 60.17682 | 18.48382 | 8.44  | N/A   | N/A  | N/A   | 2.58 | 0.61 | -0.018 |
| (MG)       | U18 | 9.41  | 14/08/2021 | 05:45 | 60.24931 | 18.41649 | 46.51 | N/A   | N/A  | N/A   | 7.25 | 0.86 | -0.018 |
|            | U14 | 14.43 | 14/08/2021 | 06:14 | 60.21550 | 18.47713 | 15.47 | N/A   | N/A  | N/A   | 4.25 | 0.81 | -0.018 |
|            | U11 | 22.96 | 08/08/2020 | 07:56 | 60.16031 | 18.58518 | 2.96  | N/A   | N/A  | N/A   | 1.05 | 1.20 | -0.017 |
|            | U13 | 18.17 | 08/08/2020 | 06:43 | 60.17682 | 18.48382 | 2.56  | N/A   | N/A  | N/A   | 1.72 | 0.74 | -0.018 |
| (MG)       | U18 | 9.41  | 08/08/2020 | 05:55 | 60.24931 | 18.41649 | 31.19 | N/A   | N/A  | N/A   | 5.48 | 0.86 | -0.018 |
|            | U14 | 14.43 | 08/08/2020 | 05:29 | 60.21550 | 18.47713 | 9.59  | N/A   | N/A  | N/A   | 3.65 | 0.74 | -0.018 |
|            | U11 | 22.96 | 10/08/2019 | 09:27 | 60.16031 | 18.58518 | 6.07  | N/A   | N/A  | N/A   | 1.92 | 0.77 | -0.018 |
|            | U13 | 18.17 | 10/08/2019 | 08:12 | 60.17682 | 18.48382 | 9.73  | N/A   | N/A  | N/A   | 3.16 | 0.90 | -0.018 |
| (MG)       | U18 | 9.41  | 10/08/2019 | 07:24 | 60.24931 | 18.41649 | 23.24 | N/A   | N/A  | N/A   | 6.56 | N/A  | N/A    |
|            | U14 | 14.43 | 10/08/2019 | 06:59 | 60.21550 | 18.47713 | 12.96 | N/A   | N/A  | N/A   | 4.46 | N/A  | N/A    |
|            | U18 | 9.41  | 20/08/2010 | N/A   | 60.24931 | 18.41649 | 36.20 | N/A   | N/A  | N/A   | N/A  | 1.24 | -0.016 |
|            | U14 | 14.43 | 20/08/2010 | N/A   | 60.21550 | 18.47713 | 15.81 | 14.54 | 0.94 | 13.59 | N/A  | 0.92 | -0.017 |
| (MG)       | U13 | 18.17 | 20/08/2010 | N/A   | 60.17682 | 18.48382 | 6.24  | 7.56  | 0.64 | 6.92  | N/A  | 0.90 | -0.017 |
|            | U11 | 22.96 | 20/08/2010 | N/A   | 60.16031 | 18.58518 | 2.35  | 5.07  | 0.55 | 4.52  | N/A  | 0.70 | -0.017 |
| Râneă      | RA6 | 3.60  | 16/05/2018 | 16:05 | 65.83400 | 22.43067 | 0.55  | 7.10  | 4.16 | 2.94  | 8.90 | 5.18 | -0.016 |
| (MRSG/UMF) | RA7 | 10.72 | 16/05/2018 | 15:30 | 65.74501 | 22.49570 | 2.52  | 3.49  | 1.67 | 1.82  | 2.49 | 2.99 | -0.016 |
|            | RA2 | 11.15 | 16/05/2018 | 16:50 | 65.72965 | 22.44760 | 1.03  | 11.60 | 6.79 | 4.81  | 2.40 | 2.65 | -0.016 |

---

|        |     |       |            |       |          |          |      |      |      |      |      |      |        |
|--------|-----|-------|------------|-------|----------|----------|------|------|------|------|------|------|--------|
| (MRSB) | RA8 | 22.14 | 16/05/2018 | 19:20 | 65.64150 | 22.55783 | 1.80 | 3.13 | 1.50 | 1.63 | 2.56 | 2.93 | -0.016 |
|        | RA8 | 22.12 | 13/06/2018 | 13:30 | 65.64193 | 22.55905 | 1.89 | 0.90 | 0.59 | 0.31 | 0.64 | 1.83 | -0.017 |
|        | RA6 | 3.60  | 13/06/2018 | 16:00 | 65.83400 | 22.43067 | 4.60 | 2.72 | 1.22 | 1.50 | 1.76 | 2.82 | -0.016 |
|        | RA7 | 10.85 | 13/06/2018 |       | 65.74377 | 22.49654 | 1.71 | 1.04 | 0.62 | 0.42 | 1.21 | 1.25 | -0.017 |
| (MRSB) | RA2 | 11.10 | 13/06/2018 | 17:40 | 65.73004 | 22.44725 | 1.70 | 2.09 | 1.46 | 0.63 | 0.72 | 1.30 | -0.017 |
|        | RA8 | 22.16 | 11/07/2018 | 14:33 | 65.64138 | 22.55826 | 5.69 | 3.13 | 1.21 | 1.93 | 0.97 | 1.15 | -0.018 |
|        | RA2 | 11.08 | 11/07/2018 | 16:36 | 65.73017 | 22.44639 | 3.47 | 2.92 | 1.57 | 1.35 | 0.72 | 1.24 | -0.018 |
|        | RA6 | 3.60  | 11/07/2018 | 16:20 | 65.83400 | 22.43067 | 2.60 | 4.31 | 2.39 | 1.92 | 1.46 | 1.59 | -0.018 |
|        | RA7 | 10.78 | 11/07/2018 | 19:50 | 65.74464 | 22.49641 | 3.15 | 3.43 | 1.97 | 1.47 | 0.66 | 1.23 | -0.018 |
